# Supplementary material
Source: Springer Nature journal article supplement (https://www.springermedizin.de/resource/supplementary/12933_2012_521_MOESM10_ESM.pdf/9538718)

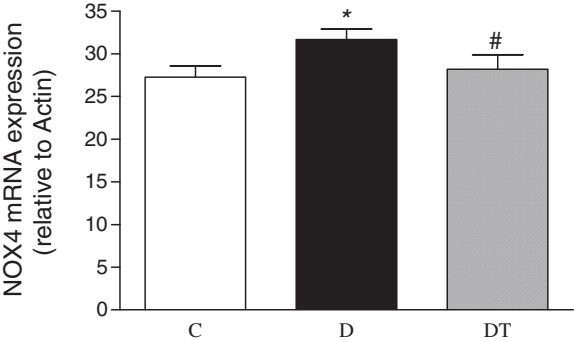

Supplement: MOESM10 [file 9538718]
